# Supplementary material for: Intrathecal Morphine and Post-Operative Pain Relief in Robotic Surgeries: A Systematic Review and Meta-Analysis
Source: MDPI journal article supplement (doi:10.3390/jcm13010137), 2023-12-26

# Supplementary Materials:

Table S1: Secondary outcomes of included studies

| Auth<br>or(s)                         | ITM Group                                                                             |                     |                     |                                     |                                          | Control                                                                                             |                     |                     |                                     |                                          | N/V<br>prophylaxi<br>s                                              | N/V<br>treatment                     |
|---------------------------------------|---------------------------------------------------------------------------------------|---------------------|---------------------|-------------------------------------|------------------------------------------|-----------------------------------------------------------------------------------------------------|---------------------|---------------------|-------------------------------------|------------------------------------------|---------------------------------------------------------------------|--------------------------------------|
|                                       | Nau<br>sea<br>(%)                                                                     | Vom<br>iting<br>(%) | Prur<br>itus<br>(%) | Urin<br>ary<br>Rete<br>ntion<br>(%) | Respir<br>atory<br>Depre<br>ssion<br>(%) | Nau<br>sea<br>(%)                                                                                   | Vom<br>iting<br>(%) | Prur<br>itus<br>(%) | Urin<br>ary<br>Rete<br>ntion<br>(%) | Respir<br>atory<br>Depre<br>ssion<br>(%) |                                                                     |                                      |
| Segal<br>et al.,<br>2013<br>[32]      | NR                                                                                    | NR                  | 38<br>(n =<br>7)    | NR                                  | NR                                       | NR                                                                                                  | NR                  | 0                   | NR                                  | NR                                       | 4mg<br>ondansetro<br>n                                              | -                                    |
| Bae<br>et al.,<br>2017<br>[27]        | 40<br>(n =<br>6)                                                                      | 20<br>(n =<br>3)    | 60<br>(n =<br>9)    | NR                                  | 0                                        | 40<br>(n =<br>6)                                                                                    | 6<br>(n =<br>1)     | 14<br>(n =<br>2)    | NR                                  | 0                                        | -                                                                   | 10mg<br>metoclopra<br>mide           |
| Koni<br>ng<br>et al.,<br>2020<br>[9]  | NR                                                                                    | NR                  | NR                  | NR                                  | NR                                       | NR                                                                                                  | NR                  | NR                  | NR                                  | NR                                       | 0.625mg IV<br>dehydrobe<br>nzperidol +<br>4mg IV<br>ondansetro<br>n | 0.625mg IV<br>dehydrobe<br>nzperidol |
| Shim<br>#1<br>et al.,<br>2020<br>[33] | 30<br>(n =<br>9)                                                                      | 6.7<br>(n =<br>2)   | 16.7<br>(n =<br>5)  | NR                                  | NR                                       | 6.7<br>(n =<br>2)                                                                                   | 0                   | 0                   | NR                                  | NR                                       | 0.0025mg/h<br>basal<br>infusion<br>ramosetron                       | -                                    |
| Dha<br>wan<br>et al.,<br>2021<br>[29] | 36.4<br>(n =<br>12)                                                                   | 0                   | 21.2<br>(n =<br>7)  | 0                                   | 0                                        | 8.1<br>(n =<br>3)                                                                                   | 0                   | 5.4<br>(n =<br>2)   | 2.7<br>(n =<br>1)                   | 0                                        | -                                                                   | Ondansetro<br>n                      |
| Shim<br>#2<br>et al.,<br>2021<br>[34] | 24<br>(n =<br>6)                                                                      | 4<br>(n =<br>1)     | 16<br>(n =<br>4)    | NR                                  | 0                                        | 8<br>(n =<br>2)                                                                                     | 0                   | 0                   | NR                                  | 0                                        | 0.0025mg/h<br>basal<br>infusion<br>ramosetron                       | -                                    |
| Chae<br>et al.,<br>2022<br>[28]       | NR                                                                                    | NR                  | NR                  | NR                                  | NR                                       | NR                                                                                                  | NR                  | NR                  | NR                                  | NR                                       | -                                                                   | -                                    |
| Russ<br>o et<br>al.,<br>2022<br>[31]  | Recovery<br>room: 18<br>(n = 2)<br>1H: 18 (n = 2)<br>12H: 9 (n = 1)<br>24H: 9 (n = 1) |                     |                     |                                     |                                          | TI group<br>Recovery<br>room: 0<br>1H = 18 (n =<br>2)<br>12H = 27 (n =<br>3)<br>24H = 27 (n =<br>3) |                     |                     |                                     |                                          | -                                                                   | 8mg<br>ondansetro<br>n               |

|                |    |    |         |   |    |    |    |         |    |            |   |
|----------------|----|----|---------|---|----|----|----|---------|----|------------|---|
| TAP Block      |    |    |         |   |    |    |    |         |    |            |   |
| group          |    |    |         |   |    |    |    |         |    |            |   |
| Recovery       |    |    |         |   |    |    |    |         |    |            |   |
| room: 9        |    |    |         |   |    |    |    |         |    |            |   |
| (n = 1)        |    |    |         |   |    |    |    |         |    |            |   |
| 1H: 18 (n = 2) |    |    |         |   |    |    |    |         |    |            |   |
| 12H: 18 (n =   |    |    |         |   |    |    |    |         |    |            |   |
| 2)             |    |    |         |   |    |    |    |         |    |            |   |
| 24H: 0         |    |    |         |   |    |    |    |         |    |            |   |
| Engst          |    |    |         |   |    |    |    |         |    |            |   |
| röm            |    |    |         |   |    |    |    |         |    |            |   |
| et al.,        |    |    |         |   |    |    |    |         |    |            |   |
| 2023           |    |    |         |   |    |    |    |         |    |            |   |
| [30]           |    |    |         |   |    |    |    |         |    |            |   |
| NR             | NR | NR | 6.52    | 0 | NR | NR | NR | 4.17    | NR | Betamethas | - |
|                |    |    | (n = 3) |   |    |    |    | (n = 2) |    | one +      |   |
|                |    |    |         |   |    |    |    |         |    | ondansetro |   |
|                |    |    |         |   |    |    |    |         |    | n          |   |

Legend: NR not reported, TAP Transversus Abdominal Plane, TI Tramadol Infusion. Continuous data are presented as absolute values unless otherwise stated.

Figure S1: Sensitivity analysis after exclusion studies not including basic analgesics in both groups.

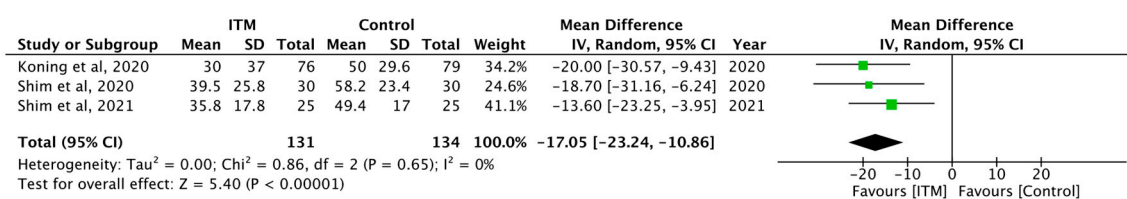

Figure S2: Funnel plot for publication bias in included studies.

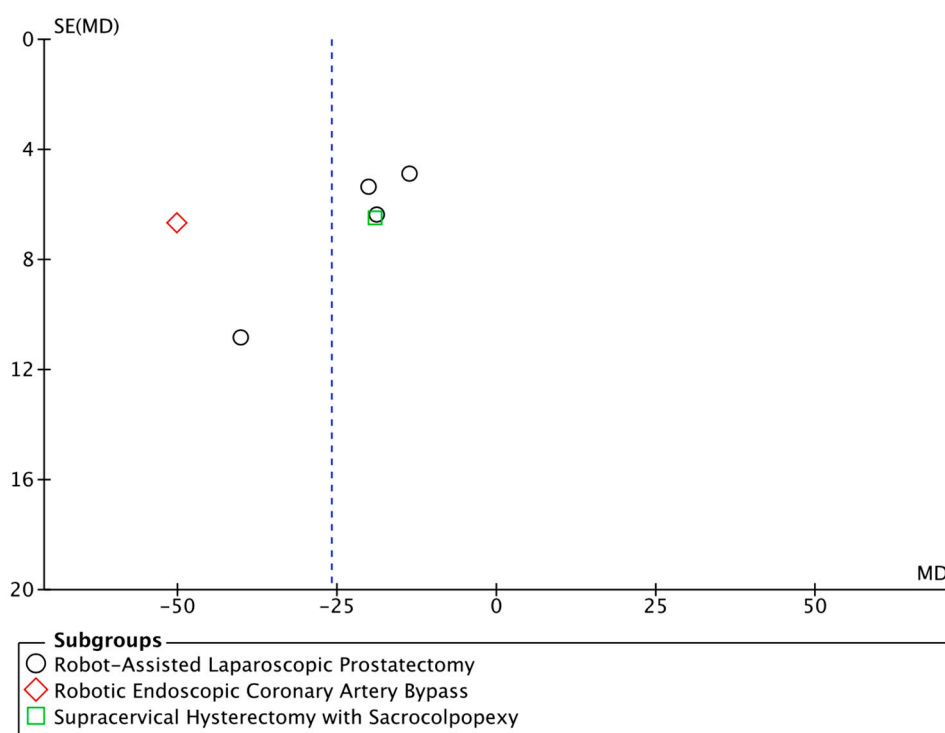

Supplement: s1 [file s1]
